# Supplementary material for: Insights into Ethiopian honey bee diversity based on wing geomorphometric and mitochondrial DNA analyses
Source: Springer Nature journal article supplement (doi:10.1007/s13592-020-00796-9), 2020-08-06
Supplement: MOESM1 [file 13592_2020_796_MOESM1_ESM.docx]

**Supplementary material**

**Insights into Ethiopian honey bee diversity based on wing geomorphometric and mitochondrial DNA analyses**

Teweldemedhn Gebretinsae Hailu*1 6, Paul D'Alvise1, Adam Tofilski3, Stefan Fuchs5, Juergen Greiling4,Peter Rosenkranz2, Martin Hasselmann1

1University of Hohenheim, Faculty of Agricultural Sciences, Institute of Animal Science, Department of Livestock Population Genomics, Garbenstraße 17, 70599 Stuttgart, Germany; 2University of Hohenheim, State Institute of Bee Research, August-von-Hartmann-Str. 13, 70599 Stuttgart, Germany; 3University of Agriculture in Krakow, Department of Zoology and Animal Welfare, Poland; 4Ethiopian Apicultural Board, Legehar, Churchill Avenue, Tekilu Desta Bldg, P.O.Box 2307 Addis Ababa, Ethiopia; 5Goethe University Frankfurt am Main, Oberursel Bee Research Institute, Karl-von-Frisch-Weg 2, 61440 Oberursel, Germany; 6Aksum University, Faculty of Agriculture, Department of Animal Sciences; P.O.Box 314 Shire, Ethiopia

*[teweldemedhng.hailu@uni-hohenheim.de](mailto:teweldemedhng.hailu@uni-hohenheim.de)

Supplementary tables

Table S1: References sequences included in phylogenetic analysis; accessed from NCBI

| Subspecies | Haplotype | Accession |
| --- | --- | --- |
| *A.m.jemenitica* | KSA4c | KC149981 |
|  | O5a | EU785974 |
|  | O5' | EU785977 |
| *A.m.jemenitica* | KSA4d | KC149982 |
|  | O5d | FJ743632 |
|  | O5 | FJ743633 |
| *A.m.jemenitica* | KSA5 | KC149985 |
|  | M3 | FJ743636 |
|  | M4 | FJ743637 |
|  | M2 | FJ743635 |
|  | C2g | FJ357807 |
|  | C2f | FJ357806 |
| *A.m.monticola* | voucher 1626 | MF678581 |
| *A.m.scutellata* | voucher 1982 | KY614238 |
| *A.m.scutellata* | voucher KR | MG552699 |
|  | A1 | EF033649 |
| *A.m.jemenitica* | Y1b | FJ477999 |
| *A.m.jemenitica* | Y1a | FJ477998 |
| *A.m.jemenitica* | Y2b | FJ478001 |
| *A.m.jemenitica* | Y2a | FJ478000 |
| *A.m.jemenitica* | Y2d | FJ478003 |

Table S2. Lineage classification (presented in diverging order) and squared Mahalanobis distance between this study sample colonies and the reference lineages A, C, M, O and Y. Most of the samples were classified as lineage Y, which was also the closest in terms of squared Mahalanobis distance.

| colony | classified as (in diverging order) | | | | | Squared Mahalanobis distance | | | | |
| --- | --- | --- | --- | --- | --- | --- | --- | --- | --- | --- |
| 1 | 2 | 3 | 4 | 5 | Y | A | O | C | M |
| 111 | Y | A | C | O | M | 39.71 | 77.8 | 130.01 | 129.26 | 167.09 |
| 112 | Y | A | O | C | M | 78.89 | 104.13 | 138.1 | 161.91 | 184.36 |
| 113 | Y | A | C | O | M | 56.35 | 79.07 | 122.79 | 105.37 | 137.17 |
| 114 | Y | A | O | C | M | 35.67 | 66.16 | 112.51 | 137.56 | 174.3 |
| 115 | Y | A | M | O | C | 47.14 | 84.29 | 156.66 | 160.81 | 139.22 |
| 116 | Y | A | O | C | M | 48.97 | 80.47 | 141.67 | 149.41 | 183.54 |
| 121 | Y | A | O | C | M | 44.17 | 63.19 | 90.74 | 95.36 | 165.29 |
| 122 | A | Y | O | C | M | 62.5 | 50.61 | 78.39 | 119.54 | 148.76 |
| 123 | Y | A | O | C | M | 42.53 | 75.15 | 109.07 | 129.03 | 206.75 |
| 124 | Y | A | O | C | M | 35.1 | 78.46 | 137.68 | 148.17 | 224.15 |
| 125 | Y | A | O | C | M | 37.97 | 75.47 | 124.68 | 152.59 | 217.87 |
| 126 | Y | A | O | C | M | 40.57 | 65.62 | 110.14 | 122.33 | 168.77 |
| 131 | Y | A | O | C | M | 30.52 | 59.95 | 110.14 | 114.38 | 145.71 |
| 132 | Y | A | O | M | C | 70.09 | 81.87 | 138.18 | 183.36 | 173.76 |
| 133 | Y | A | C | O | M | 32.17 | 51.77 | 112.61 | 105.73 | 149.93 |
| 134 | Y | A | C | O | M | 29.02 | 41.89 | 105.45 | 93.38 | 153.55 |
| 135 | Y | A | O | C | M | 43.04 | 54.86 | 109.81 | 118.28 | 143.18 |
| 136 | Y | A | O | C | M | 53.15 | 74.33 | 102.82 | 128.41 | 187.92 |
| 211 | Y | A | C | O | M | 55.98 | 84.57 | 111.66 | 104.07 | 211.95 |
| 212 | Y | A | O | C | M | 40.12 | 82.44 | 134.86 | 146.38 | 202.82 |
| 213 | Y | A | O | C | M | 48.39 | 74.54 | 103.73 | 136.95 | 191.5 |
| 214 | Y | A | O | C | M | 38.45 | 45.64 | 86.09 | 90.16 | 173.5 |
| 215 | Y | A | O | C | M | 53.09 | 55.8 | 87.38 | 91.87 | 182.76 |
| 216 | Y | A | O | C | M | 50.07 | 69.73 | 109.1 | 111.23 | 189.71 |
| 221 | Y | A | O | C | M | 87.51 | 121.53 | 141.72 | 170.96 | 267.13 |
| 222 | Y | A | O | C | M | 52.41 | 80.63 | 129.5 | 149.6 | 250.03 |
| 223 | Y | A | O | C | M | 39.86 | 58.19 | 87.56 | 132.66 | 191.16 |
| 224 | Y | A | O | C | M | 52.73 | 73.29 | 112.43 | 123.51 | 198.05 |
| 225 | Y | A | C | O | M | 38.62 | 76.27 | 139.59 | 121.09 | 215.67 |
| 226 | Y | A | O | C | M | 39.55 | 46.28 | 80.16 | 105.68 | 183.27 |
| 231 | Y | A | C | O | M | 43.96 | 46.55 | 90.77 | 65.45 | 135.83 |
| 232 | Y | A | O | C | M | 36.33 | 50.84 | 97.39 | 102.43 | 145.88 |
| 233 | A | O | Y | C | M | 77.19 | 60.45 | 73.61 | 94.15 | 165.18 |
| 234 | Y | A | C | O | M | 57.53 | 88.19 | 122.54 | 120.49 | 206.57 |
| 235 | Y | A | O | C | M | 64.63 | 89.75 | 127.17 | 128.21 | 214.57 |
| 236 | A | Y | C | O | M | 56.08 | 46.81 | 84.8 | 73.1 | 167.16 |
| 311 | Y | A | O | C | M | 68.46 | 80.4 | 106.36 | 129.37 | 212.29 |
| 312 | Y | A | O | C | M | 55.08 | 62.35 | 94.13 | 96.14 | 180.48 |
| 313 | Y | A | O | C | M | 46.41 | 53.75 | 101.82 | 120.15 | 160.68 |
| 314 | Y | A | C | O | M | 57.52 | 83.28 | 150.48 | 139.73 | 206.79 |
| 315 | Y | A | O | C | M | 46.99 | 77.37 | 112.31 | 137.61 | 227.77 |
| 316 | Y | A | O | C | M | 31.53 | 47.2 | 106.1 | 112.29 | 151.01 |
| 321 | Y | A | C | O | M | 44.94 | 57.11 | 100.39 | 99.54 | 157.53 |
| 322 | Y | A | O | C | M | 37.5 | 51.47 | 102.9 | 116.77 | 197.41 |
| 323 | Y | A | O | C | M | 29.59 | 47.47 | 107.45 | 114.15 | 166.68 |
| 324 | Y | A | C | O | M | 36.32 | 73.52 | 143.78 | 136.8 | 222.62 |
| 325 | Y | A | C | O | M | 26.91 | 59.07 | 132.33 | 123.79 | 202.49 |
| 326 | Y | A | O | C | M | 69.93 | 92.17 | 137.14 | 150.62 | 217.17 |
| 331 | A | Y | C | O | M | 48.16 | 47.33 | 103.38 | 96.98 | 119.72 |
| 332 | Y | A | O | C | M | 36.4 | 56.15 | 88.2 | 101.39 | 150.05 |
| 333 | Y | A | C | O | M | 39.33 | 64.75 | 112.58 | 101.82 | 173.56 |
| 334 | Y | A | C | O | M | 24.15 | 62 | 120.83 | 107.08 | 165.44 |
| 335 | A | Y | O | C | M | 44.86 | 39.33 | 71.76 | 96.16 | 130.59 |
| 336 | Y | A | O | C | M | 50.64 | 68.78 | 123.49 | 143.48 | 201.69 |
| 411 | Y | A | O | C | M | 51.88 | 75.03 | 110.87 | 126.17 | 179.71 |
| 412 | Y | A | C | O | M | 57.98 | 74.74 | 108.92 | 104.45 | 187.06 |
| 413 | Y | A | O | C | M | 62.29 | 89.76 | 136.14 | 148.94 | 237.28 |
| 414 | Y | A | C | O | M | 48.7 | 76.51 | 115.63 | 102.76 | 208.82 |
| 415 | Y | A | O | C | M | 52.65 | 76.57 | 110.38 | 113.47 | 160.76 |
| 416 | Y | A | O | C | M | 32.41 | 65.04 | 111.89 | 126.83 | 185.52 |
| 421 | Y | A | O | C | M | 37.01 | 58 | 118.95 | 120.77 | 147.91 |
| 422 | A | Y | O | C | M | 52.99 | 50.08 | 99.42 | 115.42 | 165.93 |
| 423 | Y | A | O | C | M | 43.96 | 67.09 | 108.74 | 127.79 | 158.09 |
| 424 | Y | A | C | O | M | 32.25 | 66.87 | 120.08 | 96.64 | 184.95 |
| 425 | Y | A | C | O | M | 29.76 | 63.43 | 118.06 | 108.86 | 186.18 |
| 426 | Y | A | C | O | M | 48.43 | 86.28 | 149.42 | 123.07 | 158.2 |

Table S3. Classification of this study sample colonies into their respective honey bee subspecies. Most of them were classified as *A.m.simensis*. Sample colonies are represented by 3 digit identification numbers.

| Colony | Classified to subspecies as (in diverging order) | | | | | | | | | | | | |
| --- | --- | --- | --- | --- | --- | --- | --- | --- | --- | --- | --- | --- | --- |
| 1 | 2 | 3 | 4 | 5 | 6 | 7 | 8 | 9 | 10 | 11 | 12 |
| 111 | sim71 | scu117 | mon121 | yem125 | lit141 | ada144 | Cap154 | uni184 | lam188 | rut198 | int199 | sah219 |
| 112 | uni112 | sim135 | mon147 | scu157 | ada190 | lit194 | cap195 | yem203 | sah224 | lam228 | int231 | rut311 |
| 113 | sim71 | ada127 | scu135 | mon141 | yem155 | lit170 | cap202 | int205 | uni216 | sah219 | lam245 | rut278 |
| 114 | sim61 | scu84 | mon93 | ada96 | lit123 | sah139 | uni144 | yem152 | int156 | cap162 | lam177 | rut277 |
| 115 | sim50 | mon92 | scu117 | ada129 | yem135 | lit143 | cap148 | uni149 | lam162 | int170 | sah184 | rut240 |
| 116 | sim104 | mon104 | scu119 | lam143 | cap148 | ada149 | yem153 | lit155 | uni181 | sah191 | int210 | rut241 |
| 121 | sim60 | scu86 | mon96 | yem109 | ada114 | lit122 | cap123 | uni150 | sah170 | int173 | lam179 | rut207 |
| 122 | sim71 | ada96 | scu98 | mon104 | yem106 | cap122 | lit123 | sah127 | int147 | uni155 | lam192 | rut195 |
| 123 | sim103 | yem135 | mon142 | scu145 | ada156 | lit166 | cap167 | uni191 | lam206 | sah218 | rut228 | int245 |
| 124 | sim75 | mon96 | scu132 | yem135 | ada136 | lit152 | cap160 | lam175 | sah188 | uni191 | rut223 | int233 |
| 125 | sim55 | scu82 | ada89 | mon92 | yem107 | lit114 | cap133 | sah146 | lam166 | uni166 | int175 | rut184 |
| 126 | sim70 | scu93 | mon94 | ada115 | yem123 | cap132 | lit134 | uni143 | lam165 | sah170 | int191 | rut205 |
| 131 | sim49 | scu83 | mon91 | ada107 | lit114 | yem116 | cap126 | uni127 | int144 | sah147 | lam170 | rut235 |
| 132 | sim69 | mon101 | scu124 | ada125 | uni127 | lit135 | yem139 | cap145 | sah153 | int169 | lam186 | rut238 |
| 133 | sim53 | scu82 | ada83 | mon104 | yem113 | sah115 | lit123 | int124 | cap133 | lam170 | uni179 | rut194 |
| 134 | sim49 | scu64 | ada77 | mon88 | yem94 | lit102 | cap107 | sah117 | int119 | uni146 | lam166 | rut171 |
| 135 | sim47 | mon65 | scu77 | ada89 | lit118 | yem120 | uni128 | cap144 | sah154 | lam158 | int171 | rut265 |
| 136 | sim92 | scu98 | mon117 | cap119 | ada128 | yem130 | lit149 | uni167 | int169 | lam180 | sah188 | rut219 |
| 211 | scu102 | sim135.7 | mon135.8 | ada143 | lit158 | yem168 | uni179 | cap184 | lam188 | sah226 | int264 | rut309 |
| 212 | sim69 | scu107 | mon116 | ada127 | lit166.5 | yem167.3 | cap168.9 | sah169.2 | uni170 | int186 | lam200 | rut225 |
| 213 | sim81 | scu83 | mon90 | ada109 | yem126 | lit130 | cap145 | uni169 | lam175 | sah194 | int225 | rut258 |
| 214 | scu69 | mon75 | sim81 | ada95 | uni103 | lit111 | yem124 | cap147 | sah148 | lam182 | int212 | rut267 |
| 215 | sim98 | scu95 | mon97 | ada102 | yem102 | lit123 | uni133 | cap139 | sah149 | int190 | lam196 | rut220 |
| 216 | Sim108 | scu123 | mon126 | uni152 | ada153 | yem160 | sah176.1 | cap176.3 | lit179 | lam218 | int242 | rut295 |
| 221 | sim128 | scu168 | mon179 | ada190 | yem192 | cap223 | lit224 | lam250 | uni257 | sah261 | int278 | rut335 |
| 222 | sim67 | scu81 | mon92 | ada93 | lit99 | yem104 | cap123 | lam142 | int148 | sah153 | rut166 | uni173 |
| 223 | sim79 | mon89 | scu89 | yem93 | ada98 | cap114 | lit114 | lam117 | uni143 | int155 | sah164 | rut212 |
| 224 | sim81 | ada88 | scu95 | yem105 | lit109 | mon115 | cap135 | lam180 | int197 | sah201 | rut201 | uni203 |
| 225 | sim66 | scu109 | mon120 | ada125 | lit166 | yem173 | uni181 | cap187 | sah187 | int207 | lam223 | rut260 |
| 226 | scu47 | sim52 | mon64 | ada68 | yem81 | lit84 | cap91 | sah118 | uni119 | lam140 | int142 | rut188 |
| 231 | sim58 | scu98 | ada72 | mon92 | yem96 | lit102 | int118 | cap120 | lam146 | sah166 | uni169 | rut177 |
| 232 | sim51 | ada77 | mon78 | scu78 | yem121 | lit122 | cap140 | int158 | lam164 | uni172 | sah172 | rut252 |
| 233 | scu78 | yem85 | sim91 | ada94 | mon104 | lit107 | cap113 | int148 | uni152 | lam157 | sah179 | rut201 |
| 234 | sim91 | ada144 | scu145 | mon150 | yem181 | lit193 | int210 | lam213 | cap216 | rut290 | uni246 | sah262 |
| 235 | sim90 | ada130 | scu131 | mon152 | yem168 | lit186 | cap190 | sah208 | int213 | uni231 | lam235 | rut334 |
| 236 | scu53 | mon77 | sim82 | ada90 | cap100 | lit104 | yem109 | uni146 | int153 | lam157 | sah163 | rut179 |
| 311 | scu126 | mon139 | sim150 | cap163 | ada168 | lit171 | yem179 | lam201 | uni203 | rut206 | int250 | sah296 |
| 312 | sim74 | yem110 | mon112 | ada113 | scu118 | lit138 | cap151 | uni172 | sah178 | lam182 | int205 | rut230 |
| 313 | mon79 | sim80 | scu106 | ada119 | lit131 | yem143 | uni144 | cap144 | lam174 | sah185 | int211 | rut247 |
| 314 | sim74 | ada120 | scu125 | mon137 | yem145 | lit156 | cap182 | int214 | uni215 | sah219 | lam221 | rut225 |
| 315 | sim49 | ada89 | scu94 | mon94 | lit110 | yem111 | cap141 | uni142 | int147 | sah148 | lam195 | rut198 |
| 316 | sim52 | mon71 | scu87 | ada105 | lit107 | yem111 | cap116 | uni158 | int171 | lam175 | sah181 | rut187 |
| 321 | sim63 | scu86 | mon93 | ada104 | yem117 | cap121 | lit129 | int148 | uni156 | lam177 | sah184 | rut188 |
| 322 | sim61 | scu66 | mon68 | ada84 | lit104 | yem105 | cap125 | sah147 | lam151 | int167 | uni173 | rut185 |
| 323 | sim43 | mon92 | scu95 | ada108 | yem112 | lit117 | uni120 | cap122 | int139 | sah151 | rut168 | lam171 |
| 324 | sim63 | mon126 | scu130 | yem152 | cap153 | ada155 | lit173 | int187 | uni194 | sah202 | rut207.6 | lam208.4 |
| 325 | sim42 | mon94 | scu95 | yem98 | ada107 | lit119 | cap121 | sah151 | int153 | uni155 | lam156 | rut183 |
| 326 | sim110 | mon123 | scu126 | ada150 | yem176 | uni178 | lit182 | cap182 | lam186 | int229 | sah256 | rut270 |
| 331 | sim69 | scu82 | ada83 | mon106 | lit126 | yem132 | cap135 | uni154 | int156 | sah171 | lam185 | rut228 |
| 332 | sim55 | ada77 | scu83 | mon97 | yem113 | lit116 | cap150 | sah164 | lam165 | int173 | uni189 | rut231 |
| 333 | sim85 | ada143 | scu145 | mon167 | yem173 | lit195 | cap206 | int215 | sah226 | uni260 | lam265 | rut284 |
| 334 | sim43 | scu119 | ada129 | mon132 | yem140 | lit157 | cap160 | int183 | uni186 | sah214 | lam235 | rut237 |
| 335 | sim74 | ada85 | scu96 | yem109 | lit114 | mon120 | cap152 | sah156 | int164 | uni193 | lam225 | rut226 |
| 336 | sim87 | scu88 | yem106 | ada113 | mon118 | cap121 | lit129 | lam147 | rut161 | int161 | uni177 | sah189 |
| 411 | scu82 | sim108 | mon109 | ada137 | cap159 | lit162 | lam178 | uni179 | yem180 | sah208 | int214 | rut272 |
| 412 | sim98 | scu117 | yem137 | ada137 | lit153 | mon156 | cap158 | int199 | rut211 | lam223 | uni235 | sah255 |
| 413 | sim96 | mon110 | scu112 | uni144 | ada155 | lit171 | yem180 | cap187 | sah194 | lam208 | int233 | rut291 |
| 414 | sim65 | scu112 | yem113 | mon126 | ada127 | cap129 | lit141 | int181 | sah208 | uni210 | lam211 | rut218 |
| 415 | sim86 | scu126 | ada145 | mon152 | yem168 | lit169 | cap186 | int207 | uni207 | lam243 | rut271 | sah245 |
| 416 | sim61 | scu76 | mon93 | ada107 | lit135 | yem146 | cap146 | uni153 | int158 | sah162 | lam168 | rut205 |
| 421 | sim49 | mon79 | ada94 | scu101 | yem116 | lit123 | sah131 | cap153 | lam165 | uni174 | int193 | rut284 |
| 422 | scu77 | yem92 | sim92 | ada99 | mon106 | lit106 | cap112 | int164 | uni164 | lam167 | sah167 | rut181 |
| 423 | sim69 | mon91 | scu115 | yem127 | cap131 | lit133 | ada135 | uni149 | lam170 | sah184 | int196 | rut245 |
| 424 | sim61 | scu95 | ada113 | mon118 | yem145 | cap147 | lit152 | int175 | sah180 | rut196 | lam198 | uni212 |
| 425 | sim51 | mon113 | scu115 | ada143 | uni156 | yem158 | cap159 | lit168 | sah173 | int203 | lam224 | rut245 |
| 426 | sim70 | scu122 | mon139 | ada146 | uni164 | cap173 | yem175 | lit178 | int200 | lam230 | rut264 | sah227 |

Note: Y: sim: *A.m.simensis*; A: scu: *A.m.scutellata*; mon: *A.m.monticola*; yem: *A.m.jementica*; lit: *A.m.litorea*; ada: *A.m.adansonii*; uni: *A.m.unicolor*; lam: *A.m.lamarckii*; lit: *A.m.litorea*; int: *A.m.intermisa*; rut: *A.m.rutnerii*; sah: *A.m.saharensis*

Superscripted values are Squared Mahalanobis distances between individual colonies of this study and the reference subspecies

Supplementary figures


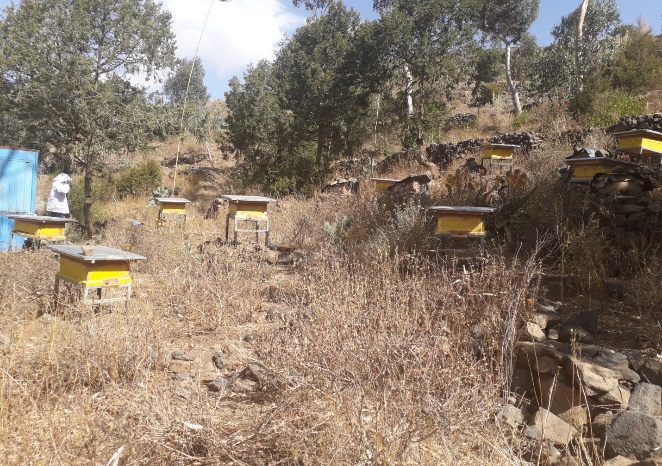


A


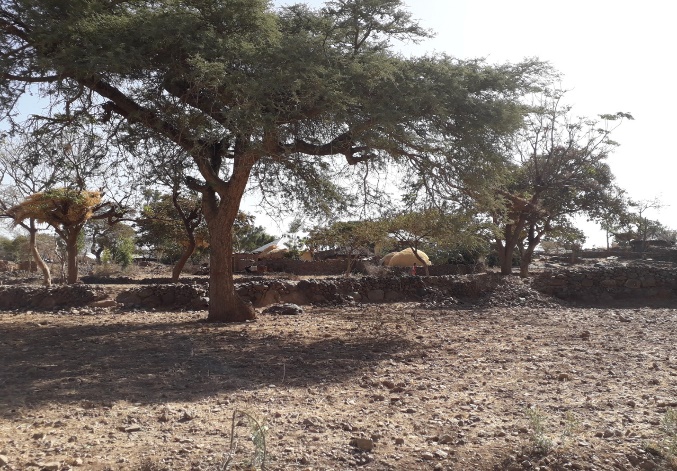

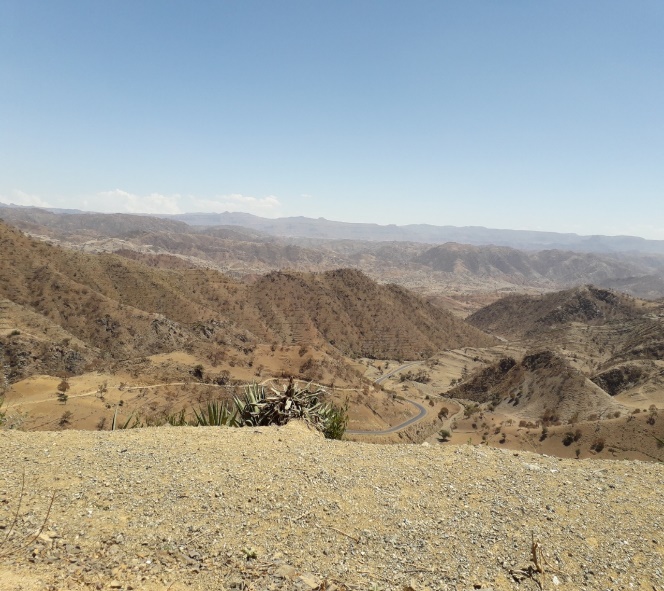

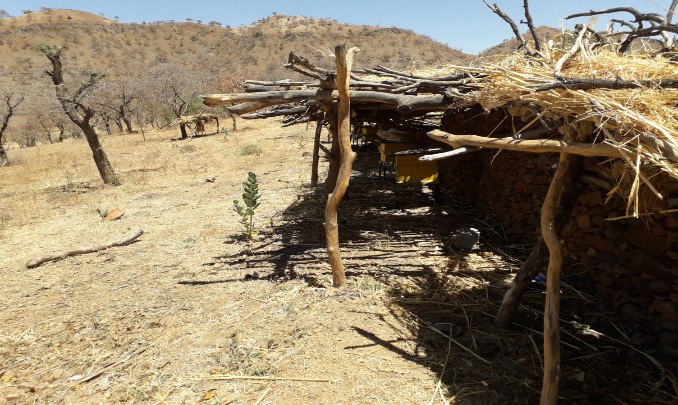


B

C

D

Fig S1. Features of the highland (A), midland (B) and lowland (C and D) agro-ecological zones in Tigray region; namely Mugulat (A), Zongui (B) and Werie (C and D) local areas, Tigray, Ethiopia. The highland study areas are mainly mountains covered with dry montane vegetation including *Juniperus procera, Olia Africana* and *Becium grandiflorum* (A); whereas the midlands are covered mainly with *Acacia itbica, Otostegia integrifolia, Cordia Africana* and *Acacia albida* (B). The lowlands have small hills mainly covered with deciduous thorny shrubs and trees of acacia species, evergreen large riparian fig tree species and *Ziziphus abyssinica* (C).

100 bp DNA ladder


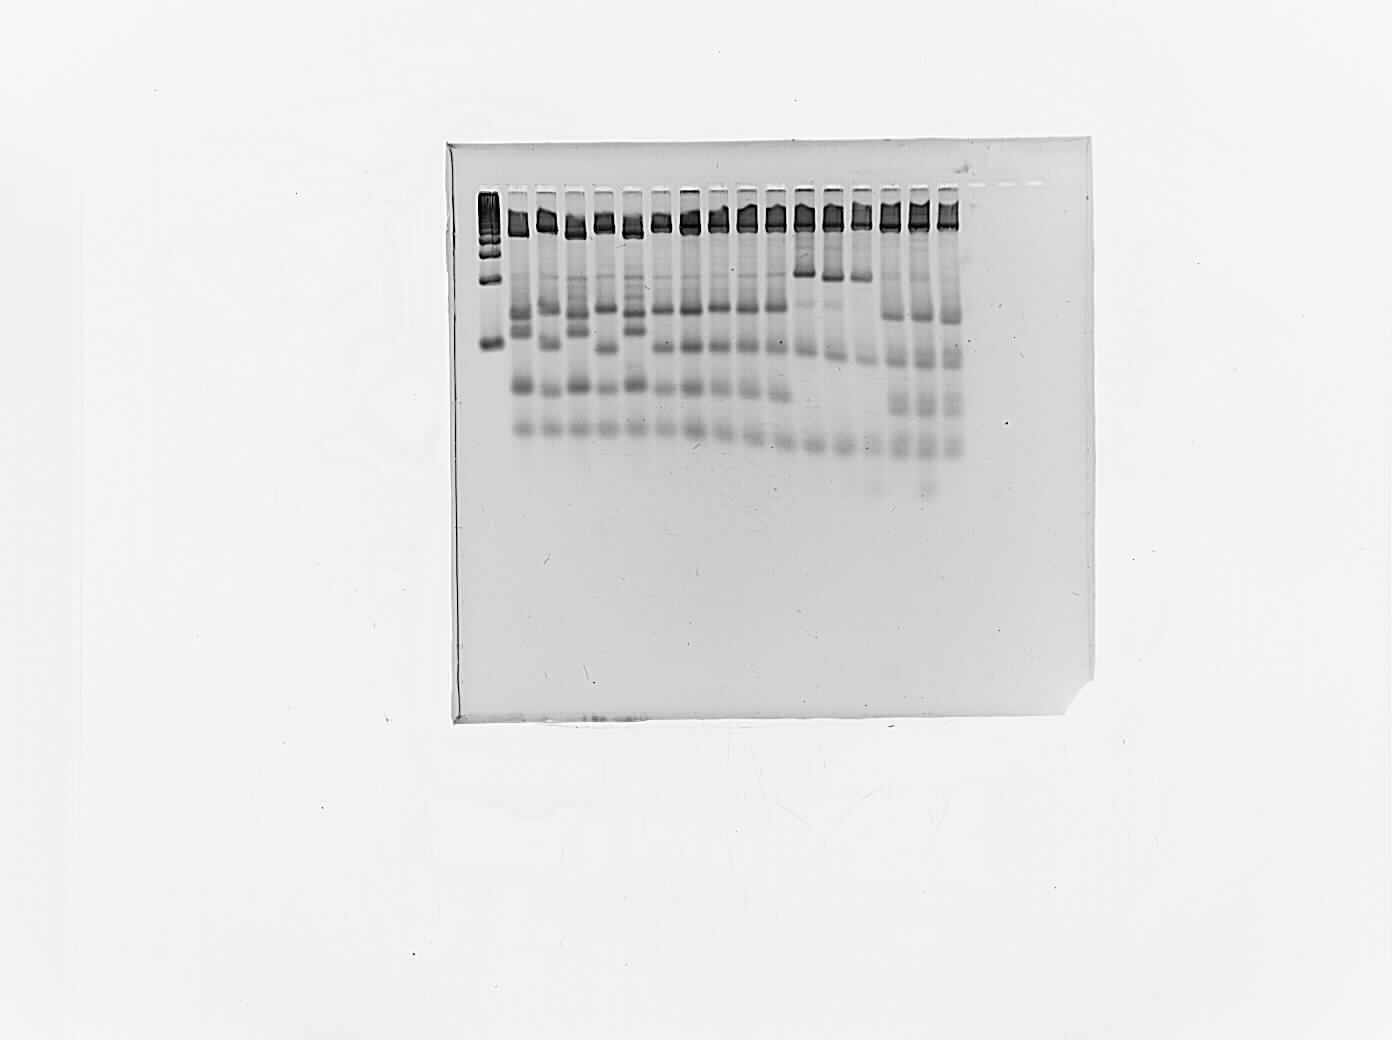


100

200

400

Fig S2. Agarose gel (4%) electrophoresis image displaying COI-COII restriction (DraI) fragments length polymorphism separated on a 100bp DNA ladder (left) for 16 samples; represented by four digit identification numbers. For the honey bees from Tigray, the first digit (right) stands for individual bee sample (one of 10 bees), the second digit represents colony numbers 1 to 6 in every site, the third digit stands for the AEZ of the specific site (1 refers to highland, 2 to midland, 3 to lowland), and the fourth digit stands for local area: 1 for Mugulat, 2 for Werie, 3 for Shire, and 4 for Wendogenet. For example, identification number 1234 means bee number 4 out of the third colony from the midland AEZ (Adikebero) of Mugulat local area. Whereas in samples from the Wendogenet, 1 represents midland and 2 represents lowland AZEs.


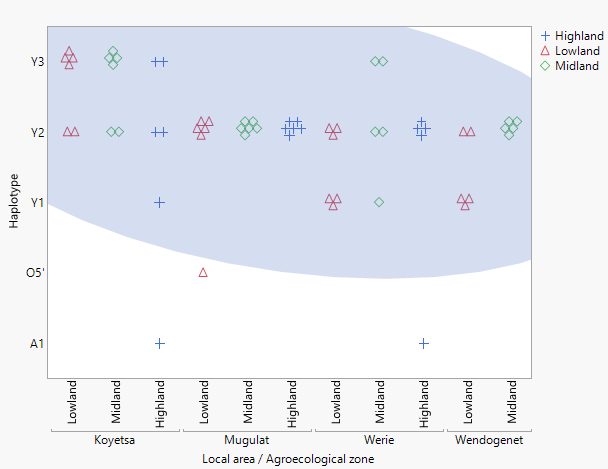


Fig S3. Plot of haplotype distribution by agroecological zones (lowland, midland, highland) in four local areas. Samples that belong to haplotypes Y1, Y2 and Y3 are within a 95% ellipse
